# Supplementary material for: Soybean Yield and Nutrition Grown on the Straw of Grain Sorghum Inoculated with Azospirillum brasilense and Intercropped with BRS Paiaguás Grass
Source: MDPI journal article supplement (doi:10.3390/plants12102007), 2023-05-17
Supplement: s1 [file s1]

**Supplementary Table S1.** Photoperiod at Selvíria, Mato Grosso do Sul State, Brazil, during the study period.

| Period                                  | Month    |          |         |          |       |
|-----------------------------------------|----------|----------|---------|----------|-------|
|                                         | November | December | January | February | March |
| Photoperiod, h day <sup>-1</sup>        |          |          |         |          |       |
| Monthly average for 2015/16 and 2016/17 | 13.2     | 13.3     | 13.2    | 12.8     | 12.2  |
| Long-term (50-yr) average               | 13.1     | 13.4     | 13.2    | 12.8     | 12.2  |

**Supplementary Table S2.** Information on the cultivar, sowing date, spacing between rows, sowing density, fertilization, top dressing date and date of harvest or management for the species used in the cropping systems from 2015 to 2017.

| Crop                           | Cultivar                                | Sowing date  | Spacing<br>between rows     | Seeding<br>density                              | Basic<br>fertilization                                                                                                                                                                          | Top<br>dressing date | Top<br>dressing                                                                                                                     | Date of harvest/<br>management |
|--------------------------------|-----------------------------------------|--------------|-----------------------------|-------------------------------------------------|-------------------------------------------------------------------------------------------------------------------------------------------------------------------------------------------------|----------------------|-------------------------------------------------------------------------------------------------------------------------------------|--------------------------------|
| Sorghum<br>(Off-season)        | cv. Ranchero                            | 17 Mar. 2015 | 0.45 m                      | 10 seeds m <sup>-1</sup>                        | <sup>a</sup> 0 kg N ha <sup>-1</sup><br><br><sup>b</sup> 36 kg N ha <sup>-1</sup><br><br><sup>c</sup> 120 kg N ha <sup>-1</sup><br><br>40 kg P ha <sup>-1</sup><br><br>25 kg K ha <sup>-1</sup> | 24 Apr. 2015         | <sup>a</sup> 120 kg N ha <sup>-1</sup><br><br><sup>b</sup> 84 kg N ha <sup>-1</sup> ,<br><br><sup>c</sup> 0 kg N ha <sup>-1</sup> , | 18 June 2015                   |
| Sorghum<br>(Off-season)        | cv. Ranchero                            | 06 Apr. 2016 | 0.45 m                      | 10 seeds m <sup>-1</sup>                        | <sup>a</sup> 0 kg N ha <sup>-1</sup><br><br><sup>b</sup> 36 kg N ha <sup>-1</sup><br><br><sup>c</sup> 120 kg N ha <sup>-1</sup><br><br>40 kg P ha <sup>-1</sup><br><br>25 kg K ha <sup>-1</sup> | 13 May 2016          | <sup>a</sup> 120 kg N ha <sup>-1</sup><br><br><sup>b</sup> 84 kg N ha <sup>-1</sup> ,<br><br><sup>c</sup> 0 kg N ha <sup>-1</sup> , | 26 July 2016                   |
| Palisade grass<br>(Off-season) | <i>U. brizantha</i> cv.<br>BRS Paiaguás | 17 Mar. 2015 | Between the<br>sorghum rows | 10 kg ha <sup>-1</sup><br>(60% seed viability). | -                                                                                                                                                                                               | -                    | -                                                                                                                                   | 18 June 2015                   |
| Palisade grass<br>(Off-season) | <i>U. brizantha</i> cv.<br>BRS Paiaguás | 06 Apr. 2016 | Between the<br>sorghum rows | 10 kg ha <sup>-1</sup><br>(60% seed viability). | -                                                                                                                                                                                               | -                    | -                                                                                                                                   | 26 July 2016                   |

|          |             |              |        |                          |                            |   |              |
|----------|-------------|--------------|--------|--------------------------|----------------------------|---|--------------|
| Soybean  | cv. BMX     | 17 Nov. 2015 | 0.45 m | 19 seeds m <sup>-1</sup> | 26 kg P ha <sup>-1</sup> , | - | 17 Mar. 2016 |
| (Season) | Potência RR |              |        |                          | 50 kg K ha <sup>-1</sup>   |   |              |
| Soybean  | cv. BMX     | 15 Nov. 2016 | 0.45 m | 19 seeds m <sup>-1</sup> | 24 kg P ha <sup>-1</sup> , | - | 03 Mar. 2017 |
| (Season) | Potência RR |              |        |                          | 46 kg K ha <sup>-1</sup>   |   |              |

<sup>a</sup> Basic fertilization: 0 kg N ha<sup>-1</sup> - Top dressing: 120 kg N ha<sup>-1</sup> (0% – 100%); <sup>b</sup> Basic fertilization: 36 kg N ha<sup>-1</sup> - Top dressing: 84 kg N ha<sup>-1</sup> (30% – 70%); <sup>c</sup> Basic fertilization: 120 kg N ha<sup>-1</sup> - Top dressing: 0 kg N ha<sup>-1</sup> (100% – 0%);
